# Supplementary material for: Characterization of non-heme iron aliphatic halogenase WelO5* from Hapalosiphon welwitschii IC-52-3: Identification of a minimal protein sequence motif that confers enzymatic chlorination specificity in the biosynthesis of welwitindolelinones
Source: PubMed Central journal article supplement (PMC5480362; doi:10.3762/bjoc.13.115), 2017-06-16
Supplement: Beilstein_J_Org_Chem-13-1168-s001.pdf [file Beilstein_J_Org_Chem-13-1168-s001.pdf]

# Supporting Information

for

## **Characterization of non-heme iron aliphatic halogenase WelO5\* from *Hapalosiphon welwitschii* IC-52-3: Identification of a minimal protein sequence motif that confers enzymatic chlorination specificity in the biosynthesis of welwitindolelinones**

Qin Zhu and Xinyu Liu\*

Address: Department of Chemistry, University of Pittsburgh, 219 Parkman Avenue, Pittsburgh, PA  
15260, USA

Email: Xinyu Liu - xinyuliu@pitt.edu

\* Corresponding author

**Additional figures**

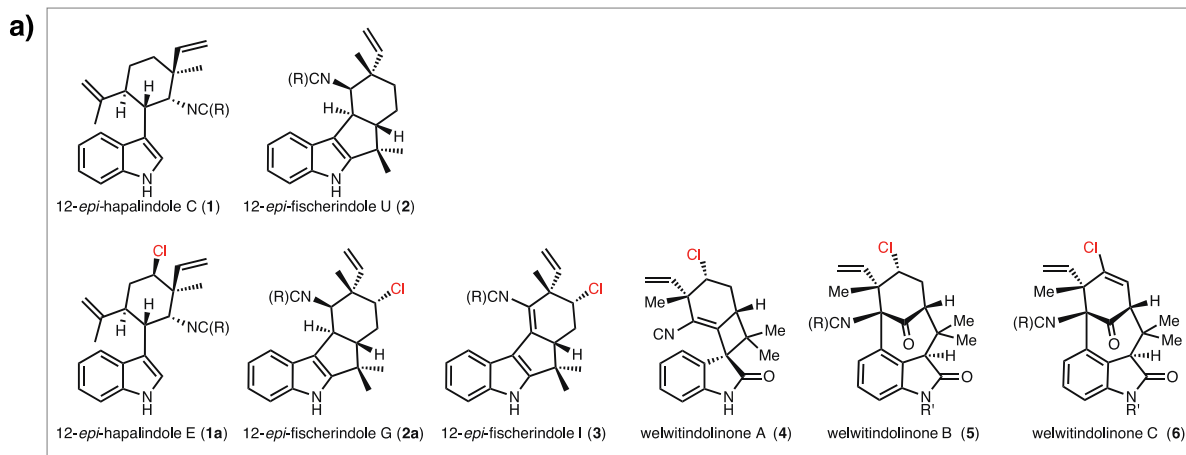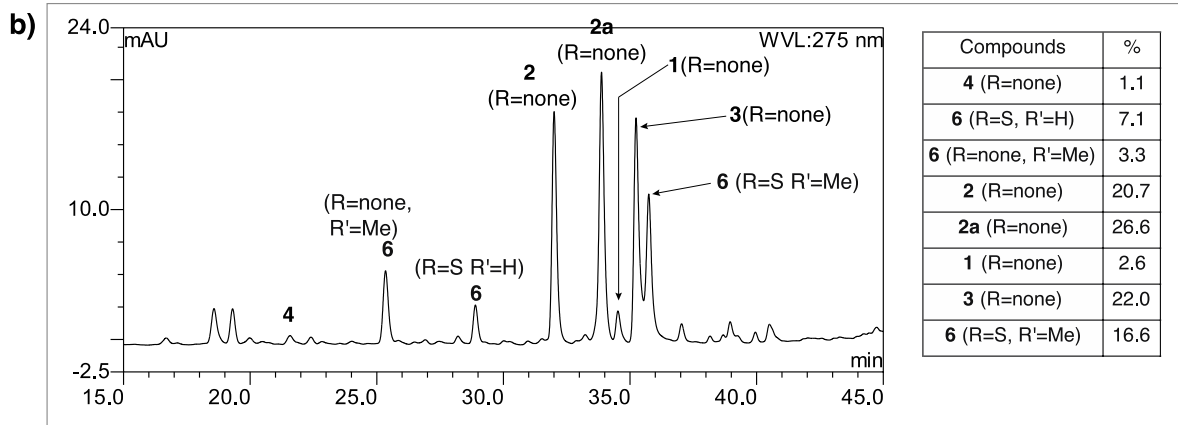

**c)**

| hapalindoles and welwitindolinones isolated from <i>H. welwitschii</i> IC-52-3 (47g dry tissue) |                                           |                   |
|-------------------------------------------------------------------------------------------------|-------------------------------------------|-------------------|
| Compound                                                                                        | Name                                      | Quantity isolated |
| 1 (R=none)                                                                                      | 12-epi-Hapalindole C isonitrile           | 11 mg             |
| 1 (R=S)                                                                                         | 12-epi-Hapalindole C isothiocyanate       | 1 mg              |
| 1a (R=none)                                                                                     | 12-epi-Hapalindole E isonitrile           | 93 mg             |
| 1a (R=S)                                                                                        | 12-epi-Hapalindole E isothiocyanate       | 4 mg              |
| 2 (R=none)                                                                                      | 12-epi-Fischerindole U isonitrile         | 4 mg              |
| 2 (R=S)                                                                                         | 12-epi-Fischerindole U isothiocyanate     | 2 mg              |
| 2a (R=none)                                                                                     | 12-epi-Fischerindole G isonitrile         | 4 mg              |
| 3 (R=none)                                                                                      | 12-epi-Fischerindole I isonitrile         | 10 mg             |
| 4 (R=none)                                                                                      | welwitindolinone A isonitrile             | 2 mg              |
| 5 (R=S, R'=H)                                                                                   | welwitindolinone B isothiocyanate         | 10 mg             |
| 5 (R=S, R'=Me)                                                                                  | N-methylwelwitindolinone B isothiocyanate | 5+12 mg           |
| 6 (R=S, R'=H)                                                                                   | welwitindolinone C isothiocyanate         | 14 mg             |
| 6 (R=none, R'=Me)                                                                               | N-methylwelwitindolinone C isonitrile     | 47mg              |
| 6 (R=S, R'=Me)                                                                                  | N-methylwelwitindolinone C isothiocyanate | 110mg             |

**Figure S1:** Summary of relative and absolute quantities of **1** and its biogenetic derivatives **1a** versus **2** and its biogenetic derivatives **2a**, **3–6** from (b) *H. welwitschii* UTEX B1830 and (c) IC-52-3. The relative quantity shown in (b) was derived from the HPLC analysis of *H. welwitschii* UTEX B1830 crude metabolites and the absolute quantity shown in (c) was derived from what was reported in ref [1]. These data were used to generate the relative molar ratio of each metabolite in the two different producers and the comparison graphs shown in Figure 1b/1c in the main text.

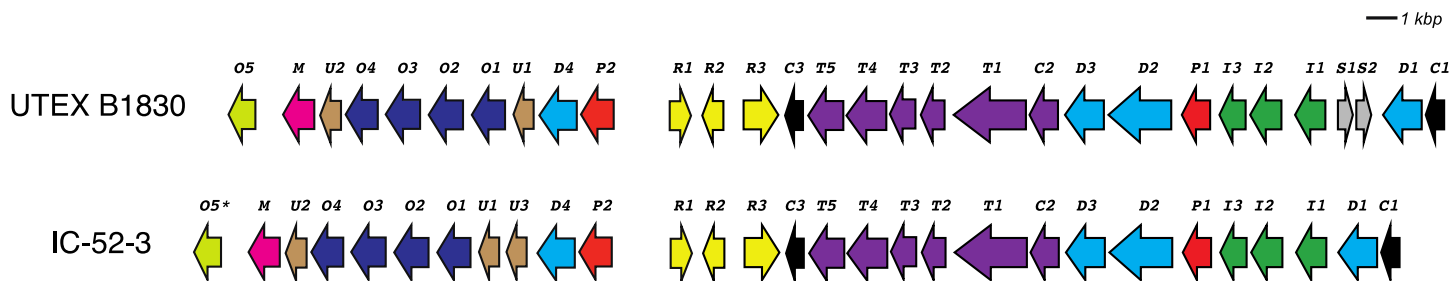

| <i>weI</i> Gene | Size (aa) | Protein sequence identity to homolog from <i>H. welwitschii</i> UTEX B1830 |
|-----------------|-----------|----------------------------------------------------------------------------|
| <i>weI</i> O5   | 290       | 95%                                                                        |
| <i>weI</i> M    | 329       | 99%                                                                        |
| <i>weI</i> U2   | 226       | 99%                                                                        |
| <i>weI</i> O4   | 359       | 99%                                                                        |
| <i>weI</i> O3   | 362       | 99%                                                                        |
| <i>weI</i> O2   | 357       | 99%                                                                        |
| <i>weI</i> O1   | 360       | 99%                                                                        |
| <i>weI</i> U1   | 228       | 97%                                                                        |
| <i>weI</i> U3   | 228       | Unique to IC523                                                            |
| <i>weI</i> D4   | 400       | 95%                                                                        |
| <i>weI</i> P2   | 334       | 99%                                                                        |
| <i>weI</i> R1   | 234       | 100%                                                                       |
| <i>weI</i> R2   | 243       | 99%                                                                        |
| <i>weI</i> R3   | 368       | 100%                                                                       |

| <i>weI</i> Gene | Size (aa) | Protein sequence identity to homolog from <i>H. welwitschii</i> UTEX B1830 |
|-----------------|-----------|----------------------------------------------------------------------------|
| <i>weI</i> C3   | 214       | 100%                                                                       |
| <i>weI</i> T5   | 365       | 99%                                                                        |
| <i>weI</i> T4   | 415       | 99%                                                                        |
| <i>weI</i> T3   | 274       | 99%                                                                        |
| <i>weI</i> T2   | 283       | 99%                                                                        |
| <i>weI</i> T1   | 734       | 99%                                                                        |
| <i>weI</i> C2   | 301       | 99%                                                                        |
| <i>weI</i> D3   | 408       | 99%                                                                        |
| <i>weI</i> D2   | 647       | 99%                                                                        |
| <i>weI</i> P1   | 308       | 100%                                                                       |
| <i>weI</i> I3   | 272       | 100%                                                                       |
| <i>weI</i> I2   | 331       | 99%                                                                        |
| <i>weI</i> I1   | 319       | 99%                                                                        |
| <i>weI</i> S1   | 169       | Unique to 1830                                                             |
| <i>weI</i> S2   | 156       | Unique to 1830                                                             |
| <i>weI</i> D1   | 406       | 99%                                                                        |
| <i>weI</i> C1   | 183       | 99%                                                                        |

**Figure S2:** Sequence identity comparison of proteins encoded in the welwitindolinone BGCs from *H. welwitschii* IC-52-3 and UTEX B1830. The names for some of the genes in the BGC from *H. welwitschii* IC-52-3 (including *weI*U1-3, *weI*O1-5 and *weI*M) (ref [2]) were renamed according to those in the BGC in *H. welwitschii* UTEX B1830 (ref [3]).

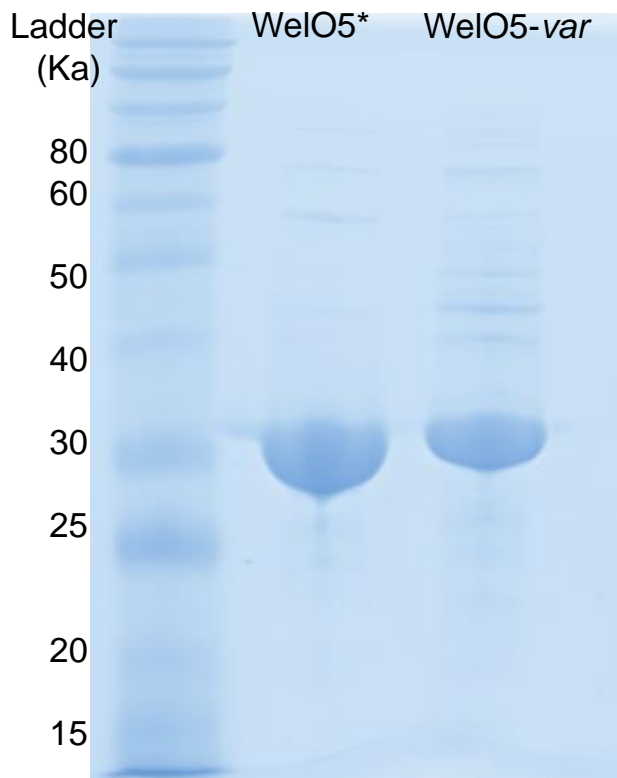

**Figure S3:** SDS-PAGE of purified NHis7-tagged WelO5\* and WelO5-var.

## References

1. K. Stratmann, R. E. Moore, R. Bonjouklian, J. B. Deeter, G. M. L. Patterson, S. Shaffer, C. D. Smith, T. A. Smitka, *J. Am. Chem. Soc.* **1994**, *116*, 9935-9942.
2. M. L. Micallef, D. Sharma, B. M. Bunn, L. Gerwick, R. Viswanathan, M. C. Moffitt, *BMC Microbiol.* **2014**, *14*, 213.
3. M. L. Hillwig, H. A. Fuhrman, K. Ittiamornkul, T. J. Sevco, D. H. Kwak, X. Liu, *ChemBioChem* **2014**, *15*, 665-669.
